# Supplementary material
Source: ML conference proceedings conference paper supplement (https://openreview.net/forum?id=u6Y0GdTEYp)
Supplement: supplementary_material [file attachment]

## Supplementary Material for "Constrained Multi-Objective Optimization"

### A SOME USEFUL LEMMA

To simplify the notions, we use  $\omega^{(t)} = (x^{(t)}, \lambda^{(t)}, z^{(t)})$  in the following proof.

**Lemma A.1** *Yao et al. (2024) Lemma A.1.* Under Assumption 4.3 and 4.4, for the Moreau envelope-based Lagrange Multiplier function  $L_s(x, \lambda, z)$  with  $\gamma_1 \in (0, 1/\rho_f)$  and  $\gamma_2 > 0$ . That is,

(1) The function  $L_s(x, \lambda, z)$  is continuously differentiable;

(2) The gradient of  $L_s(x, \lambda, z)$  has closed-form given by

$$\begin{aligned} \nabla_x L_s(x, \lambda, z) &= \arg \min_u \left\{ H(u, \theta^*) + \frac{1}{2} \|u - x\|^2 \right\} + \sum_{i=1}^n \mu_i^* \nabla g_i(x), \\ \nabla_\lambda L_s(x, \lambda, z) &= \frac{\lambda - \theta^*}{\gamma_1}, \\ \nabla_z L_s(x, \lambda, z) &= \frac{\mu^* - z}{\gamma_2}, \end{aligned}$$

where  $\theta^* := \theta^*(x, \lambda, z)$  and  $\mu^* := \mu^*(x, \lambda, z)$  is the unique saddle point of the following min-max problem:

$$\min_{\theta} \max_{\mu} \left\{ H(x, \theta) + \sum_{i=1}^N \mu_i g_i(x) + \frac{1}{2\gamma_1} \sum_{i=1}^N \|\theta_i - \lambda_i\|^2 - \frac{1}{2\gamma_2} \sum_{i=1}^N \|z_i - \mu_i\|^2 \right\}.$$

(3) Furthermore, for any  $\rho_v \geq \rho_f/(1 - \gamma_1 \rho_f)$ ,  $L_s(x, \lambda, z)$  is  $\rho_v$ -weakly convex with respect to variables  $(x, \lambda)$  on for any fixed  $z$ .

*Proof:* The proof is similar to the proof of **Lemma A.1** in Yao et al. (2024).

**Lemma A.2** *Yao et al. (2024) Lemma A.2 and Lemma A.4.*

Under Assumption 4.3 and 4.4, let  $\gamma_1 \in (0, 1/\rho_f)$  and  $\gamma_2 > 0$ . Then, for any  $\rho_v \geq \rho_f/(1 - \gamma_1 \rho_f)$ , the following inequality holds:

$$\begin{aligned} -L_s(x_1, \lambda, z) &\leq -L_s(x_2, \lambda, z) - \langle \nabla_x L_s(x_2, \lambda, z), x_1 - x_2 \rangle + \frac{\rho_v}{2} \|x_1 - x_2\|^2, \\ -L_s(x, \lambda_1, z) &\leq -L_s(x, \lambda_2, z) - \langle \nabla_\lambda L_s(x, \lambda_2, z), \lambda_1 - \lambda_2 \rangle + \frac{\rho_v}{2} \|\lambda_1 - \lambda_2\|^2, \\ -L_s(x, \lambda, z_1) &\leq -L_s(x, \lambda, z_2) - \langle \nabla_z L_s(x, \lambda, z_2), z_1 - z_2 \rangle + \frac{L_z}{2} \|z_1 - z_2\|^2, \end{aligned}$$

where  $L_z := (\gamma_2 \rho_T + 1)/(\gamma_2^2 \rho_T)$ .

*Proof:* The first 2 conclusions follow directly from **Lemma A.2** that  $L_s(x, \lambda, z)$  is  $\rho_v$ -weakly convex with respect to variables  $(x, \lambda)$  on for any fixed  $z$ , and the third conclusion is similar to the proof of **Lemma A.4** in Yao et al. (2024).

**Lemma A.3** *Yao et al. (2024) Lemma A.3.* Under Assumption 4.3 and 4.4, let  $\gamma_1 \in (0, 1/\rho_f)$  and  $\gamma_2 > 0$ . Then, for any  $(x_1, \lambda_1, z_1)$  and  $(x_2, \lambda_2, z_2)$ , the following

648 *Lipschitz property holds:*

$$\begin{aligned}
649 & \quad \left\| (\boldsymbol{\theta}^*(x_1, \boldsymbol{\lambda}_1, \mathbf{z}_1), \boldsymbol{\mu}^*(x_1, \boldsymbol{\lambda}_1, \mathbf{z}_1)) - (\boldsymbol{\theta}^*(x_2, \boldsymbol{\lambda}_2, \mathbf{z}_2), \boldsymbol{\mu}^*(x_2, \boldsymbol{\lambda}_2, \mathbf{z}_2)) \right\| \\
650 & \leq \frac{L_f + L_g + C_Z L_g}{\rho_T} \|x_1 - x_2\| + \frac{1}{\gamma_1 \rho_T} \|\boldsymbol{\lambda}_1 - \boldsymbol{\lambda}_2\| + \frac{1}{\gamma_2 \rho_T} \|\mathbf{z}_1 - \mathbf{z}_2\| \\
651 & \leq L_{\theta, \mu} \|(x_1, \boldsymbol{\lambda}_1, \mathbf{z}_1) - (x_2, \boldsymbol{\lambda}_2, \mathbf{z}_2)\|,
\end{aligned}$$

652 where  $\rho_T := \min\{1/\gamma_1 - \rho_f, 1/\gamma_2\}$ ,  $C_Z = \max_{z \in Z} \|z\|$ , and  $L_{\theta, \mu} := \sqrt{3} \max\{L_f +$   
653  $L_g + C_Z L_g, 1/\gamma_1, 1/\gamma_2\}/\rho_T$ .

654 *Proof:* The proof is similar to the proof of **Lemma A.3** in Yao et al. (2024).

## 662 B PROOF OF MAIN THEOREM AND LEMMAS

### 664 B.1 PROOF OF THEOREM 4.6

665 **Theorem 4.6** If Assumptions of Assumptions 4.2, 4.3 and 4.4 hold, let  $\gamma_1 \in$   
666  $(0, 1/\rho_\gamma)$ ,  $\gamma_2 > 0$ ,  $c_t = \underline{c}(t+1)^p$  with  $p \in (0, 1/2)$  and  $\underline{c} > 0$ . Pick  $\eta_t \in (0, \rho_\gamma/L_B^2)$ ,  
667 then there exists  $c_\alpha, c_\beta > 0$  such that when  $\alpha \in (\underline{\alpha}, c_\alpha)$  and  $\beta \in (\underline{\beta}, c_\beta)$ , with  
668  $\underline{\alpha}, \underline{\beta} > 0$ , the sequence of  $(x^{(t)}, \boldsymbol{\lambda}^{(t)}, \mathbf{z}^{(t)}, \boldsymbol{\theta}^{(t)}, \boldsymbol{\mu}^{(t)})$  generated by Algorithm 1:  
669 MLM-CMOO satisfies

$$670 \min_t \left\| (\boldsymbol{\theta}^{(t)}, \boldsymbol{\mu}^{(t)}) - (\boldsymbol{\theta}^*(x^{(t)}, \boldsymbol{\lambda}^{(t)}, \mathbf{z}^{(t)}), \boldsymbol{\mu}^*(x^{(t)}, \boldsymbol{\lambda}^{(t)}, \mathbf{z}^{(t)})) \right\| = \mathcal{O}\left(\frac{1}{\sqrt{T}}\right),$$

671 and

$$672 \min_t R_t(x^{(t)}, \boldsymbol{\lambda}^{(t)}, \mathbf{z}^{(t)}) = \mathcal{O}\left(\frac{1}{\sqrt{T^{1-2p}}}\right).$$

673 *Proof:* First, using the descent lemma in Lemma 4.5 and its condition, telescoping  
674 the inequality for  $t = 0, 1, \dots, T-1$ , we get

$$\begin{aligned}
675 V_T - V_0 & \leq -\frac{1}{4\alpha} \sum_{t=0}^{T-1} \left( \|x^{(t+1)} - x^{(t)}\|^2 + \|\boldsymbol{\lambda}^{(t+1)} - \boldsymbol{\lambda}^{(t)}\|^2 \right) - \frac{1}{4\beta} \sum_{t=0}^{T-1} \|\mathbf{z}^{(t+1)} - \mathbf{z}^{(t)}\|^2 \\
676 & \quad - \eta \rho_T C_{\theta, \mu} \sum_{t=0}^{T-1} \left\| (\boldsymbol{\theta}^{(t)}, \boldsymbol{\mu}^{(t)}) - (\boldsymbol{\theta}^*(x^{(t)}, \boldsymbol{\lambda}^{(t)}, \mathbf{z}^{(t)}), \boldsymbol{\mu}^*(x^{(t)}, \boldsymbol{\lambda}^{(t)}, \mathbf{z}^{(t)})) \right\|^2.
\end{aligned}$$

677 From assumptions, we have  $\sum_{t=0}^{T-1} \left\| (\boldsymbol{\theta}^{(t)}, \boldsymbol{\mu}^{(t)}) - (\boldsymbol{\theta}^*(x^{(t)}, \boldsymbol{\lambda}^{(t)}, \mathbf{z}^{(t)}), \boldsymbol{\mu}^*(x^{(t)}, \boldsymbol{\lambda}^{(t)}, \mathbf{z}^{(t)})) \right\|^2$   
678 is upper bounded, which is

$$679 \sum_{t=0}^{T-1} \left\| (\boldsymbol{\theta}^{(t)}, \boldsymbol{\mu}^{(t)}) - (\boldsymbol{\theta}^*(x^{(t)}, \boldsymbol{\lambda}^{(t)}, \mathbf{z}^{(t)}), \boldsymbol{\mu}^*(x^{(t)}, \boldsymbol{\lambda}^{(t)}, \mathbf{z}^{(t)})) \right\|^2 \leq +\infty.$$

680 Thus, we have

$$681 \min_t \left\| (\boldsymbol{\theta}^{(t)}, \boldsymbol{\mu}^{(t)}) - (\boldsymbol{\theta}^*(x^{(t)}, \boldsymbol{\lambda}^{(t)}, \mathbf{z}^{(t)}), \boldsymbol{\mu}^*(x^{(t)}, \boldsymbol{\lambda}^{(t)}, \mathbf{z}^{(t)})) \right\| = \mathcal{O}\left(\frac{1}{\sqrt{T}}\right).$$

Secondly, according to the update rule of variables  $(x, y, z)$ , we have

$$0 \in c_t(d_x^{(t)}, d_\lambda^{(t)}) + \mathcal{M}_C(x^{(t)}, \lambda^{(t)}) + \frac{c_t}{\alpha}((x^{(t+1)}, \lambda^{(t+1)}) - (x^{(t)}, \lambda^{(t)})),$$

$$0 \in c_t d_z^{(t)} + \mathcal{M}_Z(z^{(t+1)}) + \frac{c_t}{\beta}(z^{(t+1)} - z^{(t)}).$$

where  $d_x^{(t)} = \frac{1}{c^{(t)}} \nabla_x F(x^{(t)}, \lambda^{(t)}) + U + \sum_{i=1}^n \mu_i^{(t+1)} \nabla_x g_i(x^{(t)})$ ,  $d_\lambda^{(t)} = \frac{1}{c^{(t)}}(\lambda^{(t)} - \lambda') + \mathbf{V} - \frac{1}{\gamma_1}(\lambda^{(t)} - \theta)^{(t+1)}$ , and  $d_z^{(t)} = \mu^{(t+1)} - z^{(t)}$ . Note,  $U = \arg \min_u \{H(u, \lambda^{(t)}) + \frac{1}{2} \|u - x^{(t)}\|^2\} - \arg \min_u \{H(u, \theta^{(t+1)}) + \frac{1}{2} \|u - x^{(t)}\|^2\}$ ,  $\lambda' = \arg \min_\lambda \|\sum_{i=1}^m \lambda_i \nabla f_i(x^{(t)})\|$ , and  $\mathbf{V} = \arg \min_v \{H(x^{(t)}, v) + \frac{1}{2} \|v - \lambda^{(t)}\|^2\} - \arg \min_v \{H(u, \theta^{(t+1)}) + \frac{1}{2} \|u - x^{(t)}\|^2\}$ .

By the meanings of  $d_x^{(t)}$ ,  $d_\lambda^{(t)}$ , and  $d_z^{(t)}$ , we obtain

$$(e_{x,\lambda}^{(t)}, e_z^{(t)}) \in (\nabla F(x^{(t+1)}, \lambda^{(t+1)}), 0) + c_t \left( \sum_{i=1}^n \mu_i \nabla g_i(x^{(t+1)}), 0 \right) \\ - c_t (\nabla L_{i,s,r}(x^{(t+1)}, \lambda^{(t+1)}, z^{(t+1)}) + \mathcal{M}_{C \times Z}(x^{(t+1)}, \lambda^{(t+1)}, z^{(t+1)}),$$

where

$$e_{x,\lambda}^{(t)} := \nabla_{x,\lambda} \phi_{c_t}(x^{(t)}, \lambda^{(t)}, z^{(t)}) - c_t(d_x^{(t)}, d_\lambda^{(t)}) - \frac{c_t}{\alpha}((x^{(t+1)}, \lambda^{(t+1)}) - ((x^{(t)}, \lambda^{(t)})),$$

$$e_z^{(t)} := \nabla_z \phi_{c_t}(x^{(t)}, \lambda^{(t)}, z^{(t)}) - c_t(d_x^{(t)}, d_\lambda^{(t)}) - c_t d_z^{(t)} - \frac{c_t}{\beta}(z^{(t+1)} - z^{(t)}).$$

Next, we estimate  $\|e_{x,\lambda}^{(t)}\|$ . Using the estimates in Yao et al. (2024), we have

$$\|e_{x,\lambda}^{(t)}\| \leq c_t L_{\phi_1} \|(x^{(t+1)}, \lambda^{(t+1)}, z^{(t+1)}) - (x^{(t)}, \lambda^{(t)}, z^{(t)})\| \\ + \frac{c_t}{\alpha} \|(x^{(t+1)}, \lambda^{(t+1)}) - (x^{(t)}, \lambda^{(t)})\| + c_t C_{\phi_1} \\ + \|(\theta^{(t)}, \mu^{(t)}) - (\theta^*(x^{(t)}, \lambda^{(t)}, z^{(t)}), \mu^*(x^{(t)}, \lambda^{(t)}, z^{(t)}))\|,$$

where  $C_{\phi_1} := \sqrt{\max\{2(L_g + C_z L_g)^2, 2L_g^2\}}$ .

For  $\|e_z^{(t)}\|$ , we have

$$\|e_z^{(t)}\| \leq \left(\frac{c_t}{\beta} + \frac{c_t}{\gamma_2}\right) \|z^{(t+1)} - z^{(t)}\| + \frac{c_t}{\gamma_2} \|\mu^{(t)} - \mu^*(x^{(t)}, \lambda^{(t)}, z^{(t)})\|.$$

Thus,

$$R_t(x^{(t)}, \lambda^{(t)}, z^{(t)}) \leq \left(\frac{c_t}{\beta} + \frac{c_t}{\gamma_2}\right) \|z^{(t+1)} - z^{(t)}\| + \frac{c_t}{\alpha} \|(x^{(t+1)}, \lambda^{(t+1)}) - (x^{(t)}, \lambda^{(t)})\| \\ + c_t \left(C_{\phi_1} + \frac{1}{\gamma_2}\right) \|(\theta^{(t)}, \mu^{(t)}) - (\theta^*(x^{(t)}, \lambda^{(t)}, z^{(t)}), \mu^*(x^{(t)}, \lambda^{(t)}, z^{(t)}))\| \\ + c_t L_{\phi_1} \|(x^{(t+1)}, \lambda^{(t+1)}, z^{(t+1)}) - (x^{(t)}, \lambda^{(t)}, z^{(t)})\|.$$

Let  $\alpha_t \geq \underline{\alpha}$  and  $\beta_t \geq \underline{\beta}$  for some positive constants  $\underline{\alpha}$  and  $\underline{\beta}$ , we can show that there exists  $C_R > 0$  such that

$$\frac{1}{c_t^2} R_t^2(x^{(t)}, \lambda^{(t)}, z^{(t)}) \leq C_R \left( \frac{1}{4\underline{\alpha}} \|(x^{(t+1)}, \lambda^{(t+1)}) - (x^{(t)}, \lambda^{(t)})\|^2 + \frac{1}{4\underline{\beta}} \|z^{(t+1)} - z^{(t)}\|^2 \right)$$

$$+ \eta \rho_T C_{\theta, \mu} \left\| (\boldsymbol{\theta}^{(t)}, \boldsymbol{\mu}^{(t)}) - (\boldsymbol{\theta}^*(x^{(t)}, \boldsymbol{\lambda}^{(t)}, \mathbf{z}^{(t)}), \boldsymbol{\mu}^*(x^{(t)}, \boldsymbol{\lambda}^{(t)}, \mathbf{z}^{(t)})) \right\|^2.$$

This completes the proof.

## B.2 PROOF OF LEMMA 4.7

**Lemma 4.7.** Under Assumption 4.3 and 4.4, let  $\gamma_1 \in (0, 1/\rho_f)$ ,  $\gamma_2 > 0$  and pick  $\eta \in (0, \rho_T/L_b^2)$ , where  $L_b := \max\{L_f + L_g + C_z L_g + 1/\gamma_1, L_g + 1/\gamma_2\}$ . Then, the sequence generated by Algorithm 1 satisfies

$$\begin{aligned} & \left\| (\boldsymbol{\theta}^{(t+1)}, \boldsymbol{\mu}^{(t+1)}) - (\boldsymbol{\theta}^*(\boldsymbol{\omega}^{(t)}), \boldsymbol{\mu}^*(\boldsymbol{\omega}^{(t)})) \right\| \\ & \leq (1 - \eta \rho_T) \left\| (\boldsymbol{\theta}^{(t)}, \boldsymbol{\mu}^{(t)}) - (\boldsymbol{\theta}^*(\boldsymbol{\omega}^{(t)}), \boldsymbol{\mu}^*(\boldsymbol{\omega}^{(t)})) \right\|. \end{aligned}$$

*Proof:* The proof is similar to the proof of **Lemma A.5** in Yao et al. (2024).

## B.3 PROOF OF LEMMA 4.8

**Lemma 4.8.** Suppose the assumption of 4.2, 4.3 and 4.4 hold, and let  $\gamma_1 \in (0, 1/\rho_g)$ ,  $\gamma_2 > 0$ . Pick  $\eta \in (0, \rho_\gamma/L_B^2)$  with  $L_B := \max\{2L_g + C_z L_g + 1/\gamma_1, L_g + 1/\gamma_2\}$  then the sequence of  $(\boldsymbol{\omega}^{(t)})$  generated by Algorithm 1: MLM-CMOO satisfies

$$\begin{aligned} \phi_{c_t}(\boldsymbol{\omega}^{(t+1)}) & \leq \phi_{c_t}(\boldsymbol{\omega}^{(t)}) - \left(\frac{1}{2\beta} - \frac{L_{vz}}{2}\right) \|\mathbf{z}^{(t+1)} - \mathbf{z}^{(t)}\|^2 \\ & \quad - \left(\frac{1}{2\alpha} - \frac{L_{\phi_k}}{2} - \frac{\beta L_{\theta, \mu}^2}{\gamma_2^2}\right) \left(\|x^{(t+1)} - x^{(t)}\|^2 + \|\boldsymbol{\lambda}^{(t+1)} - \boldsymbol{\lambda}^{(t)}\|^2\right) \\ & \quad + \frac{\alpha}{2} \left(2(L_g + C_z L_g)^2 + \frac{1}{\gamma_1^2}\right) \|\boldsymbol{\theta}^{(t+1)} - \boldsymbol{\theta}^*(\boldsymbol{\omega}^{(t)})\|^2 \\ & \quad + \left(\alpha L_g^2 + \frac{\beta}{\gamma_2^2}\right) \|\boldsymbol{\mu}^{(t+1)} - \boldsymbol{\mu}^*(\boldsymbol{\omega}^{(t)})\|^2, \end{aligned}$$

where  $L_{\phi_t} := L_f/c_t + L_g + \rho_v$ .

*Proof:* Given Assumptions 4.2, 4.3, and 4.4 that  $\nabla F$  and  $\nabla g$  are  $L_F$ - and  $L_g$ -Lipschitz continuous on their domain, respectively, and applying **Lemma 5.7** in Beck (2017)] and previous Lemmas, we obtain

$$\begin{aligned} \phi_{c_t}(\boldsymbol{\omega}^{(t+1)}) & \leq \phi_{c_t}(\boldsymbol{\omega}^{(t)}) + \langle \nabla_{x, \boldsymbol{\lambda}} \phi_{c_t}(\boldsymbol{\omega}^{(t)}), (x^{(t+1)}, \boldsymbol{\lambda}^{(t+1)}) - (x^{(t)}, \boldsymbol{\lambda}^{(t)}) \rangle \\ & \quad + \frac{L_{\phi_t}}{2} \|(x^{(t+1)}, \boldsymbol{\lambda}^{(t+1)}) - (x^{(t)}, \boldsymbol{\lambda}^{(t)})\|^2, \end{aligned}$$

with  $L_{\phi_t} := L_F/c_t + L_g + \rho_v$ . Based on the update rule of variable  $x^{(t)}, \boldsymbol{\lambda}^{(t)}$ , the convexity and the property of the proximal operator, we have

$$\left\langle (x^{(t)}, \boldsymbol{\lambda}^{(t)}) - \alpha(d_x^{(t)}, d_\lambda^{(t)}) - (x^{(t+1)}, \boldsymbol{\lambda}^{(t+1)}), (x^{(t)}, \boldsymbol{\lambda}^{(t)}) - (x^{(t+1)}, \boldsymbol{\lambda}^{(t+1)}) \right\rangle \leq 0,$$

thus, we have

$$\left\langle (d_x^{(t)}, d_\lambda^{(t)}), (x^{(t+1)}, \boldsymbol{\lambda}^{(t+1)}) - (x^{(t)}, \boldsymbol{\lambda}^{(t)}) \right\rangle \leq -\frac{1}{\alpha} \|(x^{(t+1)}, \boldsymbol{\lambda}^{(t+1)}) - (x^{(t)}, \boldsymbol{\lambda}^{(t)})\|^2.$$

Considering the formula of  $\nabla_{x,\lambda}L_{s,r}$  derived in **Lemma A.2** and the meanings of  $d_x^{(t)}$ ,  $d_\lambda^{(t)}$  provided in the previous proof, we can obtain that

$$\begin{aligned}
& \left\| \nabla_{x,\lambda}L_{s,r}(\omega^{(t)}) - (d_x^{(t)}, d_\lambda^{(t)}) \right\|^2 \\
&= \left\| \nabla_x H(x^{(t)}, \theta^*(\omega^{(t)})) + \sum_{i=1}^n \mu_i^*(\omega^{(t)}) \nabla_x g(x^{(t)}) - \nabla_x H(x^{(t)}, \theta^{(t+1)}) - \sum_{i=1}^n \mu_i^{(t+1)} \nabla_x g(x^{(t)}) \right\|^2 \\
&\quad + \frac{1}{\gamma_1^2} \left\| \theta^{(t+1)} - \theta^*(\omega^{(t)}) \right\|^2 \\
&\leq 2 \left\| \nabla_x H(x^{(t)}, \theta^*(\omega^{(t)})) + \sum_{i=1}^n \mu_i^*(\omega^{(t)}) \nabla_x g(x^{(t)}) - \nabla_x H(x^{(t)}, \theta^*(\omega^{(t)})) - \sum_{i=1}^n \mu_i^{(t+1)} \nabla_x g(x^{(t)}) \right\|^2 \\
&\quad + 2 \left\| \nabla_x H(x^{(t)}, \theta^*(\omega^{(t)})) + \sum_{i=1}^n \mu_i^{(t+1)} \nabla_x g(x^{(t)}) - \nabla_x H(x^{(t)}, \theta^{(t+1)}) - \sum_{i=1}^n \mu_i^{(t+1)} \nabla_x g(x^{(t)}) \right\|^2 \\
&\quad + \frac{1}{\gamma_1^2} \left\| \theta^{(t+1)} - \theta^*(\omega^{(t)}) \right\|^2 \\
&\leq \left( 2(L_f + C_Z L_g + \frac{1}{\gamma_1^2}) \left\| \theta^{(t+1)} - \theta^*(\omega^{(t)}) \right\|^2 + 2L_g^2 \left\| \mu^{(t+1)} - \mu^*(\omega^{(t)}) \right\|^2 \right),
\end{aligned}$$

which yields

$$\begin{aligned}
& \left\langle \nabla_{x,\lambda}L_{s,r}(\omega^{(t)}) - (d_x^{(t)}, d_\lambda^{(t)}), \lambda^{(t+1)}, (x^{(t+1)}, \lambda^{(t+1)}) - (x^{(t)}, \lambda^{(t)}) \right\rangle \\
&\leq \frac{\alpha}{2} \left( 2(L_f + C_Z L_g + \frac{1}{\gamma_1^2}) \left\| \theta^{(t+1)} - \theta^*(\omega^{(t)}) \right\|^2 + \alpha L_g^2 \left\| \mu^{(t+1)} - \mu^*(\omega^{(t)}) \right\|^2 \right) \\
&\quad + \frac{1}{2\alpha} \left\| (x^{(t+1)}, \lambda^{(t+1)}) - (x^{(t)}, \lambda^{(t)}) \right\|^2,
\end{aligned}$$

Combing with the above inequalities, we have

$$\begin{aligned}
\phi_{c_t}(\omega^{(t+1)}) &\leq \phi_{c_t}(\omega^{(t)}) + \left( \frac{1}{2\alpha} - \frac{L_{\phi_t}}{2} \right) \left\| (x^{(t+1)}, \lambda^{(t+1)}) - (x^{(t)}, \lambda^{(t)}) \right\|^2 \\
&\quad + \frac{\alpha}{2} \left( 2(L_f + C_Z L_g + \frac{1}{\gamma_1^2}) \left\| \theta^{(t+1)} - \theta^*(\omega^{(t)}) \right\|^2 + \alpha L_g^2 \left\| \mu^{(t+1)} - \mu^*(\omega^{(t)}) \right\|^2 \right)
\end{aligned}$$

For variable  $z$ , we have

$$\phi_{c_t}(\omega^{(t+1)}) \leq \phi_{c_t}(\omega^{(t)}) + \left\langle \nabla_z \phi_{c_t}(\omega^{(t)}), z^{(t+1)} - z^{(t)} \right\rangle + \frac{L_z}{2} \left\| z^{(t+1)} - z^{(t)} \right\|^2.$$

According to the property of the proximal gradient, we have

$$\left\langle d_z^{(t)}, z^{(t+1)} - z^{(t)} \right\rangle \leq -\frac{1}{\beta} \left\| z^{(t+1)} - z^{(t)} \right\|^2$$

Thus, we have

$$\phi_{c_t}(\omega^{(t+1)}) \leq \phi_{c_t}(\omega^{(t)}) + \left\langle \nabla_z \phi_{c_t}(\omega^{(t)}) - d_z^{(t)}, z^{(t+1)} - z^{(t)} \right\rangle + \left( \frac{L_z}{2} - \frac{1}{\beta} \right) \left\| z^{(t+1)} - z^{(t)} \right\|^2.$$

Based on the definition of  $d_z^{(t)}$  provided in the previous section, we have

$$\|\boldsymbol{\omega}^{(t)} - d_z^{(t)}\|^2 \leq \frac{1}{\gamma_2^2} \|\boldsymbol{\mu}^{(t+1)} - \boldsymbol{\mu}^*(x^{(t+1)}, \boldsymbol{\lambda}^{(t+1)}, \mathbf{z}^{(t)})\|^2,$$

and

$$\langle \nabla_z \phi_{c_t}(\boldsymbol{\omega}^{(t)}) - d_z^{(t)}, \mathbf{z}^{(t+1)} - \mathbf{z}^{(t)} \rangle \leq \frac{\beta}{2\gamma_2^2} \|\boldsymbol{\mu}^{(t+1)} - \boldsymbol{\mu}^*(x^{(t+1)}, \boldsymbol{\lambda}^{(t+1)}, \mathbf{z}^{(t)})\|^2 + \frac{1}{2\beta} \|\mathbf{z}^{(t+1)} - \mathbf{z}^{(t)}\|^2$$

The, for variable  $\mathbf{z}$ , we can get

$$\begin{aligned} \phi_{c_t}(\boldsymbol{\omega}^{(t+1)}) &\leq \phi_{c_t}(\boldsymbol{\omega}^{(t)}) + \frac{\beta}{2\gamma_2^2} \|\boldsymbol{\mu}^{(t+1)} - \boldsymbol{\mu}^*(x^{(t+1)}, \boldsymbol{\lambda}^{(t+1)}, \mathbf{z}^{(t)})\|^2 + \left(\frac{L_z}{2} - \frac{1}{2\beta}\right) \|\mathbf{z}^{(t+1)} - \mathbf{z}^{(t)}\|^2 \\ &\leq \phi_{c_t}(\boldsymbol{\omega}^{(t)}) + \frac{\beta}{2\gamma_2^2} \|\boldsymbol{\mu}^{(t+1)} - \boldsymbol{\mu}^*(x^{(t)}, \boldsymbol{\lambda}^{(t)}, \mathbf{z}^{(t)})\|^2 + \left(\frac{L_z}{2} - \frac{1}{2\beta}\right) \|\mathbf{z}^{(t+1)} - \mathbf{z}^{(t)}\|^2 \\ &\quad + \frac{\beta L_{\boldsymbol{\theta}, \boldsymbol{\mu}}^2}{2\gamma_2^2} \|(x^{(t+1)}, \boldsymbol{\lambda}^{(t+1)}) - (x^{(t)}, \boldsymbol{\lambda}^{(t)})\|^2. \end{aligned}$$

Combining the inequities for variable  $(x, \boldsymbol{\lambda})$  and  $\mathbf{z}$ , we can get Lemma 4.8.

#### B.4 PROOF OF LEMMA 4.5

**Lemma 4.5** Under Assumptions 4.2, 4.3 and 4.4 hold, let  $\gamma_1 \in (0, 1/\rho_T)$ ,  $\gamma_2 > 0$ ,  $c_t \leq c_{t+1}$  and  $\eta_t \in (\eta, \rho_\gamma/L_B^2)$  with  $\eta > 0$ , then there exist constants  $c_\alpha, c_\beta > 0$  such that when  $0 < \alpha \leq c_\alpha$  and  $0 < \beta \leq c_\beta$ , the sequence of  $(x^{(t)}, \boldsymbol{\lambda}^{(t)}, \mathbf{z}^{(t)})$  generated by Algorithm 1: MLM-CMOO satisfies

$$\begin{aligned} V_{t+1} - V_t &\leq -\frac{1}{4\alpha} \|x^{(t+1)} - x^{(t)}\|^2 - \frac{1}{4\alpha} \|\boldsymbol{\lambda}^{(t+1)} - \boldsymbol{\lambda}^{(t)}\|^2 - \frac{1}{4\beta} \|\mathbf{z}^{(t+1)} - \mathbf{z}^{(t)}\|^2 \\ &\quad - \eta \rho_T C_{\boldsymbol{\theta}, \boldsymbol{\mu}} \|(\boldsymbol{\theta}^{(t)}, \boldsymbol{\mu}^{(t)}) - (\boldsymbol{\theta}^*(x^{(t)}, \boldsymbol{\lambda}^{(t)}, \mathbf{z}^{(t)}), \boldsymbol{\mu}^*(x^{(t)}, \boldsymbol{\lambda}^{(t)}, \mathbf{z}^{(t)}))\|^2. \end{aligned}$$

*Proof:* From Lemma 4.8 and server aggregation rule, we have

$$\begin{aligned} \phi_{c_t}(\boldsymbol{\omega}^{(t)}) &\leq \phi_{c_t}(\boldsymbol{\omega}^{(t)}) - \left(\frac{1}{2\beta} - \frac{L_{v_z}}{2}\right) \|\mathbf{z}^{(t+1)} - \mathbf{z}^{(t)}\|^2 \tag{8} \\ &\quad - \left(\frac{1}{2\alpha} - \frac{L_{\phi_k}}{2} - \frac{\beta L_{\boldsymbol{\theta}, \boldsymbol{\mu}}^2}{\gamma_2^2}\right) \left(\|x^{(t+1)} - x^{(t)}\|^2 + \|\boldsymbol{\lambda}^{(t+1)} - \boldsymbol{\lambda}^{(t)}\|^2\right) \\ &\quad + \frac{\alpha}{2} \left(2(L_g + C_z L_g)^2 + \frac{1}{\gamma_1^2}\right) \|\boldsymbol{\theta}^{(t+1)} - \boldsymbol{\theta}^*(\boldsymbol{\omega}^{(t)})\|^2 \\ &\quad + \left(\alpha L_g^2 + \frac{\beta}{\gamma_2^2}\right) \|\boldsymbol{\mu}^{(t+1)} - \boldsymbol{\mu}^*(\boldsymbol{\omega}^{(t)})\|^2. \end{aligned}$$

Since  $c_{t+1} \geq c_t$ , we can infer that  $(F(x^{(t)}, \boldsymbol{\lambda}^{(t)}) - \underline{F})/c_{t+1} \leq (F(x^{(t)}, \boldsymbol{\lambda}^{(t)}) - \underline{F})/c_t$ . Combining with inequality equation 8 leads to

$$V_{t+1} - V_t = \phi_{c_{t+1}}(\boldsymbol{\omega}^{(t+1)}) - \phi_{c_t}(\boldsymbol{\omega}^{(t)}) + C_{\boldsymbol{\theta}, \boldsymbol{\mu}} \|(\boldsymbol{\theta}^{(t+1)}, \boldsymbol{\mu}^{(t+1)}) - (\boldsymbol{\theta}^*(\boldsymbol{\omega}^{(t+1)}), \boldsymbol{\mu}^*(\boldsymbol{\omega}^{(t+1)}))\|^2$$

$$\begin{aligned}
& -C_{\theta,\mu} \left\| (\boldsymbol{\theta}^{(t)}, \boldsymbol{\mu}^{(t)}) - (\boldsymbol{\theta}^*(\boldsymbol{\omega}^{(t)}), \boldsymbol{\mu}^*(\boldsymbol{\omega}^{(t)})) \right\|^2 \\
& \leq -\left(\frac{1}{2\alpha} - \frac{L_{\phi_t}}{2} - \frac{\beta L_{\theta,\mu}^2}{\gamma_2^2}\right) \left\| (x^{(t+1)}, \boldsymbol{\lambda}^{(t+1)}) - (x^{(t)}, \boldsymbol{\lambda}^{(t)}) \right\|^2 - \left(\frac{1}{2\beta} - \frac{L_{v_z}}{2}\right) \left\| \mathbf{z}^{(t+1)} - \mathbf{z}^{(t)} \right\|^2 \\
& \quad + (\alpha L_g^2 + \frac{\beta}{\gamma_2^2}) \left\| \boldsymbol{\mu}^{(t+1)} - \boldsymbol{\mu}^*(\boldsymbol{\omega}^{(t)}) \right\|^2 + \frac{\alpha}{2} \left( 2(L_g + C_z L_g)^2 + \frac{1}{\gamma_1^2} \right) \left\| \boldsymbol{\theta}^{(t+1)} - \boldsymbol{\theta}^*(\boldsymbol{\omega}^{(t)}) \right\|^2 \\
& \quad + C_{\theta,\mu} \left\| (\boldsymbol{\theta}^{(t+1)}, \boldsymbol{\mu}^{(t+1)}) - (\boldsymbol{\theta}^*(\boldsymbol{\omega}^{(t+1)}), \boldsymbol{\mu}^*(\boldsymbol{\omega}^{(t+1)})) \right\|^2 \\
& \quad - C_{\theta,\mu} \left\| (\boldsymbol{\theta}^{(t)}, \boldsymbol{\mu}^{(t)}) - (\boldsymbol{\theta}^*(\boldsymbol{\omega}^{(t)}), \boldsymbol{\mu}^*(\boldsymbol{\omega}^{(t)})) \right\|^2 \\
& \leq -\left(\frac{1}{2\alpha} - \frac{L_{\phi_t}}{2} - \frac{\beta L_{\theta,\mu}^2}{\gamma_2^2}\right) \left\| (x^{(t+1)}, \boldsymbol{\lambda}^{(t+1)}) - (x^{(t)}, \boldsymbol{\lambda}^{(t)}) \right\|^2 - \left(\frac{1}{2\beta} - \frac{L_{v_z}}{2}\right) \left\| \mathbf{z}^{(t+1)} - \mathbf{z}^{(t)} \right\|^2 \\
& \quad + C_{\theta,\lambda} \left\{ -\left\| (\boldsymbol{\theta}^{(t)}, \boldsymbol{\mu}^{(t)}) - (\boldsymbol{\theta}^*(\boldsymbol{\omega}^{(t)}), \boldsymbol{\mu}^*(\boldsymbol{\omega}^{(t)})) \right\|^2 + \left\| (\boldsymbol{\theta}^{(t)}, \boldsymbol{\mu}^{(t)}) - (\boldsymbol{\theta}^*(\boldsymbol{\omega}^{(t)}), \boldsymbol{\mu}^*(\boldsymbol{\omega}^{(t)})) \right\|^2 \right. \\
& \quad \left. + 2 \max\{\alpha, \beta\} \left\| (\boldsymbol{\theta}^{(t+1)}, \boldsymbol{\mu}^{(t+1)}) - (\boldsymbol{\theta}^*(\boldsymbol{\omega}^{(t)}), \boldsymbol{\mu}^*(\boldsymbol{\omega}^{(t)})) \right\|^2 \right\},
\end{aligned}$$

where the last inequality follows from the fact that  $C_{\theta,\lambda} := \max\{(L_g + C_z L_g)^2 + 1/(2\gamma_1^2) + L_g^2, 1/\gamma_2^2\}$ .

Then, for the last 3 terms in the previous equation, we have

$$\begin{aligned}
& -\left\| (\boldsymbol{\theta}^{(t)}, \boldsymbol{\mu}^{(t)}) - (\boldsymbol{\theta}^*(\boldsymbol{\omega}^{(t)}), \boldsymbol{\mu}^*(\boldsymbol{\omega}^{(t)})) \right\|^2 + \left\| (\boldsymbol{\theta}^{(t)}, \boldsymbol{\mu}^{(t)}) - (\boldsymbol{\theta}^*(\boldsymbol{\omega}^{(t)}), \boldsymbol{\mu}^*(\boldsymbol{\omega}^{(t)})) \right\|^2 \\
& \quad + 2\alpha \left\| (\boldsymbol{\theta}^{(t+1)}, \boldsymbol{\mu}^{(t+1)}) - (\boldsymbol{\theta}^*(\boldsymbol{\omega}^{(t)}), \boldsymbol{\mu}^*(\boldsymbol{\omega}^{(t)})) \right\|^2 \\
& \stackrel{a}{\leq} \left(1 + \frac{1}{\epsilon_t}\right) \left\| (\boldsymbol{\theta}^*(\boldsymbol{\omega}^{(t+1)}), \boldsymbol{\mu}^*(\boldsymbol{\omega}^{(t+1)})) - (\boldsymbol{\theta}^*(\boldsymbol{\omega}^{(t)}), \boldsymbol{\mu}^*(\boldsymbol{\omega}^{(t)})) \right\|^2 \\
& \quad - \left\| (\boldsymbol{\theta}^{(t)}, \boldsymbol{\mu}^{(t)}) - (\boldsymbol{\theta}^*(\boldsymbol{\omega}^{(t)}), \boldsymbol{\mu}^*(\boldsymbol{\omega}^{(t)})) \right\|^2 \\
& \quad + (1 + \epsilon_t + 2\alpha) \left\| (\boldsymbol{\theta}^{(t+1)}, \boldsymbol{\mu}^{(t+1)}) - (\boldsymbol{\theta}^*(\boldsymbol{\omega}^{(t)}), \boldsymbol{\mu}^*(\boldsymbol{\omega}^{(t)})) \right\|^2 \\
& \stackrel{b}{\leq} \left(1 + \frac{1}{\epsilon_t}\right) L_{\theta,\mu} \left\| \boldsymbol{\omega}^{(t+1)} - \boldsymbol{\omega}^{(t)} \right\|^2 - \left\| (\boldsymbol{\theta}^{(t)}, \boldsymbol{\mu}^{(t)}) - (\boldsymbol{\theta}^*(\boldsymbol{\omega}^{(t)}), \boldsymbol{\mu}^*(\boldsymbol{\omega}^{(t)})) \right\|^2 \\
& \quad + (1 + \epsilon_t + 2\alpha)(1 - \eta\rho_T)^2 \left\| (\boldsymbol{\theta}^{(t+1)}, \boldsymbol{\mu}^{(t+1)}) - (\boldsymbol{\theta}^*(\boldsymbol{\omega}^{(t)}), \boldsymbol{\mu}^*(\boldsymbol{\omega}^{(t)})) \right\|^2 \\
& \leq \left(1 + \frac{2}{\eta\rho_T}\right) L_{\theta,\mu}^2 \left\| \boldsymbol{\omega}^{(t+1)} - \boldsymbol{\omega}^{(t)} \right\|^2 - \eta\rho_T \left\| (\boldsymbol{\theta}^{(t)}, \boldsymbol{\mu}^{(t)}) - (\boldsymbol{\theta}^*(\boldsymbol{\omega}^{(t)}), \boldsymbol{\mu}^*(\boldsymbol{\omega}^{(t)})) \right\|^2,
\end{aligned}$$

where  $a$  from Lemma A.5 and A.7 for  $\epsilon > 0$ , and  $b$  from setting  $\epsilon = \eta\rho_T/2$  and picking  $\alpha \leq \eta\rho_T/4$  where holds that  $(1 + \epsilon + 2\alpha)(1 - \eta\rho_T) \leq 1$ .

Similarly, we can show that when  $\beta \leq \eta\rho_T/4$ , it holds that

$$\begin{aligned}
& -\left\| (\boldsymbol{\theta}^{(t)}, \boldsymbol{\mu}^{(t)}) - (\boldsymbol{\theta}^*(\boldsymbol{\omega}^{(t)}), \boldsymbol{\mu}^*(\boldsymbol{\omega}^{(t)})) \right\|^2 + \left\| (\boldsymbol{\theta}^{(t)}, \boldsymbol{\mu}^{(t)}) - (\boldsymbol{\theta}^*(\boldsymbol{\omega}^{(t)}), \boldsymbol{\mu}^*(\boldsymbol{\omega}^{(t)})) \right\|^2 \\
& \leq \left(1 + \frac{2}{\eta\rho_T}\right) L_{\theta,\mu}^2 \left\| \boldsymbol{\omega}^{(t+1)} - \boldsymbol{\omega}^{(t)} \right\|^2 - \eta\rho_T \left\| (\boldsymbol{\theta}^{(t)}, \boldsymbol{\mu}^{(t)}) - (\boldsymbol{\theta}^*(\boldsymbol{\omega}^{(t)}), \boldsymbol{\mu}^*(\boldsymbol{\omega}^{(t)})) \right\|^2.
\end{aligned}$$

Combining the above inequities, we have

$$\begin{aligned}
V_{t+1} - V_t & \leq -\left(\frac{1}{2\alpha} - \frac{L_{\phi_t}}{2} - \frac{\beta L_{\theta,\mu}^2}{\gamma_2^2} - \left(1 + \frac{2}{\eta\rho_T}\right) L_{\theta,\mu}^2 C_{\theta,\lambda}\right) \left\| (x^{(t+1)}, \boldsymbol{\lambda}^{(t+1)}) - (x^{(t)}, \boldsymbol{\lambda}^{(t)}) \right\|^2 \\
& \quad - \left(\frac{1}{2\beta} - \frac{L_{v_z}}{2} - \left(1 + \frac{2}{\eta\rho_T}\right) L_{\theta,\mu}^2 C_{\theta,\lambda}\right) \left\| \mathbf{z}^{(t+1)} - \mathbf{z}^{(t)} \right\|^2
\end{aligned}$$

$$+ \eta \rho_T C_{\theta, \lambda} \|(\boldsymbol{\theta}^{(t)}, \boldsymbol{\mu}^{(t)}) - (\boldsymbol{\theta}^*(\boldsymbol{\omega}^{(t)}), \boldsymbol{\mu}^*(\boldsymbol{\omega}^{(t)}))\|^2.$$

When  $c_{t+1} \geq c_t$ ,  $\eta \geq \underline{\eta} > 0$ ,  $\alpha \leq \underline{\eta} \rho_T / 4$  and  $\beta \leq \underline{\eta} \rho_T / 4$ , then  $\frac{L_{\phi_t}}{2} + \frac{\beta L_{\boldsymbol{\theta}, \boldsymbol{\mu}}^2}{\gamma_2^2} + (1 + \frac{2}{\eta \rho_T}) L_{\boldsymbol{\theta}, \boldsymbol{\mu}}^2 C_{\boldsymbol{\theta}, \boldsymbol{\mu}} \leq \frac{L_{\phi_0}}{2} - \frac{\eta \rho_T L_{\boldsymbol{\theta}, \boldsymbol{\mu}}^2}{\gamma_2^2} - (1 + \frac{2}{\eta \rho_T}) L_{\boldsymbol{\theta}, \boldsymbol{\mu}}^2 C_{\boldsymbol{\theta}, \boldsymbol{\mu}} =: C_\alpha$  and  $\frac{L_{v_z}}{2} + (1 + \frac{2}{\eta \rho_T}) L_{\boldsymbol{\theta}, \boldsymbol{\mu}}^2 C_{\boldsymbol{\theta}, \boldsymbol{\mu}} \leq \frac{L_{v_z}}{2} + (1 + \frac{2}{\eta \rho_T}) L_{\boldsymbol{\theta}, \boldsymbol{\mu}}^2 C_{\boldsymbol{\theta}, \boldsymbol{\mu}} =: C_\beta$

Consequently, if  $C_\alpha, C_\beta > 0$  satisfies  $C_\alpha \leq \min\left\{\frac{\eta \rho_T}{4}, \frac{1}{4C_\alpha}\right\}$  and  $C_\beta \leq \min\left\{\frac{\eta \rho_T}{4}, \frac{1}{4C_\beta}\right\}$ , it holds that  $\frac{L_{\phi_t}}{2} + \frac{\beta L_{\boldsymbol{\theta}, \boldsymbol{\mu}}^2}{\gamma_2^2} + (1 + \frac{2}{\eta \rho_T}) L_{\boldsymbol{\theta}, \boldsymbol{\mu}}^2 C_{\boldsymbol{\theta}, \boldsymbol{\mu}} \geq \frac{1}{4\alpha}$  and  $\frac{L_{v_z}}{2} + (1 + \frac{2}{\eta \rho_T}) L_{\boldsymbol{\theta}, \boldsymbol{\mu}}^2 C_{\boldsymbol{\theta}, \boldsymbol{\mu}} \geq \frac{1}{4\beta}$

This completes the proof.
